# Supplementary material for: Estimating the occurrence of primary ubiquinone deficiency by analysis of large-scale sequencing data
Source: PubMed Central journal article supplement (PMC5735152; doi:10.1038/s41598-017-17564-y), 2017-12-18
Supplement: 41598_2017_17564_MOESM2_ESM.pdf [file 41598_2017_17564_MOESM2_ESM.pdf]

# **Estimating the occurrence of primary ubiquinone deficiency by analysis of large-scale sequencing data**

## **Supplemental Figure**

Bryan G. Hughes<sup>1</sup>, Paul M. Harrison<sup>1</sup> & Siegfried Hekimi<sup>1\*</sup>

<sup>1</sup> Department of Biology, McGill University, Montreal, Canada

\* Corresponding author: 1235 Avenue Docteur Penfield, H3A 1B1 Montreal, 514-398-6440  
[siegfried.hekimi@mcgill.ca](mailto:siegfried.hekimi@mcgill.ca)

## Divergence from even population distribution

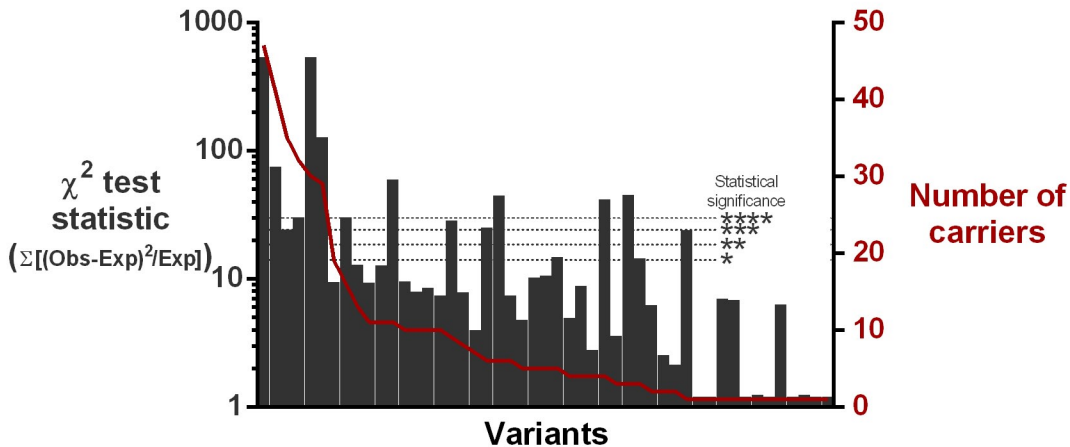

As a measure of divergence from an expected, even, distribution across populations,  $\chi^2$  test statistics (dark grey) of allele frequencies for each variant are plotted on the left x-axis. The number of carriers for each variant (red) is plotted on the right x-axis.

If variants are evenly distributed within populations (i.e., equal frequencies), then the difference between the observed and expected (based on assumption of equal frequencies) carrier numbers should be minimal and the  $\chi^2$  test statistic will be small. If a variant is present in one or more populations in a frequency much different than the other populations, then  $\chi^2$  will be larger. Variants with fewer carriers (i.e., a smaller sample size) should result in a  $\chi^2$  test with lower statistical power.
